# Supplementary material for: Plasticity of ether lipids promotes ferroptosis susceptibility and evasion
Source: Springer Nature journal article supplement (doi:10.1038/s41586-020-2732-8), 2020-09-16
Supplement: MOESM4 [file 41586_2020_2732_MOESM4_ESM.xlsx]

## Sheet: OVCAR8_4d
Gene_symbol	number_of_sgRNAs	mean_enrichment	median_enrichment	enrichment_3rd_sgRNA	enrichment_4th_sgRNA	ks.pvalue	bh
ACSL4	10	1.7919	2.0836	2.60834	2.55871	5e-06	0.0460804
PEX7	10	1.3851	1.4414	1.83096	1.61248	2.55e-05	0.112598
PEX1	10	0.891	1.0742	1.55871	1.4531	3.02e-05	0.112598
C3orf38	10	1.5019	1.1769	2.55389	1.70174	6.54e-05	0.120499
MIDN	9	0.8243	0.7292	0.794775	0.772833	8.33e-05	0.123017
CHP1	10	1.3498	1.2042	1.64289	1.53634	0.000137186	0.133048
KAT6A	9	1.1848	0.8409	0.997592	0.844679	0.000277869	0.171014
KEAP1	10	0.7757	0.9673	1.49335	1.27052	0.000317008	0.171014
AGPAT6	9	1.3795	1.0727	1.30229	1.22257	0.000324822	0.171014
AGPS	9	1.2555	1.2396	2.14996	1.47081	0.000371543	0.175549
CNOT8	10	0.9068	0.9057	1.73928	0.973746	0.000438911	0.183024
CYR61	10	0.9623	0.4323	1.37428	0.622211	0.000445817	0.183024
KRTAP27-1	10	1.4928	0.7513	2.65999	1.88552	0.000614591	0.209724
TIA1	10	0.6761	0.4816	0.992316	0.889971	0.000741854	0.213685
JTB	10	0.9074	0.412	1.3453	0.624262	0.0007748	0.213685
ZFP28	10	0.6184	0.9475	1.48471	1.35443	0.000793334	0.213685
TCAIM	10	0.7012	0.7053	0.995225	0.978712	0.000828042	0.213685
FOSL1	7	1.0527	1.0293	1.04707	1.02934	0.000876353	0.213685
TIMM8A	9	0.8343	1.2067	1.47812	1.25238	0.000915878	0.216695
ACSBG2	10	0.7442	0.9775	1.11125	1.10723	0.00104215	0.23137
ETFA	10	1.5999	0.5534	2.06686	1.45236	0.00109632	0.237669
ELFN1	10	0.747	0.5097	1.33194	1.30091	0.00114811	0.240538
SPINT4	6	1.1914	0.622	0.773714	0.470247	0.00114871	0.240538
NRN1L	9	0.677	0.7095	1.78698	0.743923	0.00118577	0.242779
MAF	10	0.8058	0.4518	0.832819	0.769944	0.00151319	0.270708
MLLT1	10	0.6584	0.7872	0.964807	0.866412	0.00173318	0.277716
SLC44A1	10	0.6411	0.3322	0.848744	0.607079	0.00182966	0.284681
ANO9	10	0.731	0.8616	1.25516	1.13528	0.00199294	0.284681
VTN	9	1.0156	1.0303	1.51689	1.20952	0.00268305	0.310947
FABP3	10	0.5863	0.6669	0.872369	0.816389	0.00272794	0.312222
HTR1F	10	0.59	0.5074	0.725999	0.705299	0.00278074	0.312443
TSSK3	10	0.7939	0.9443	1.29676	1.19831	0.0028634	0.319122
KIAA0101	10	1.0193	0.8646	1.55089	0.897243	0.00299192	0.32523
SMG9	9	0.7883	0.8486	1.34233	1.18038	0.00305358	0.325793
TXNRD1	9	1.3455	0.7418	2.86905	1.19169	0.00332858	0.32955
UCK1	10	1.2478	1.2194	1.61075	1.41512	0.00342458	0.32955
AEBP2	10	1.0718	1.0836	1.9169	1.22242	0.00343558	0.32955
IGF1	10	0.7518	0.9579	1.52629	1.47683	0.00352934	0.332308
PHKA1	10	0.5976	0.7509	1.04196	0.959806	0.00391198	0.350072
FAM105B	10	1.1052	0.9263	1.89975	1.60601	0.00391354	0.350072
PEX3	10	0.7051	0.6998	1.17538	0.782106	0.00423051	0.365989
HRASLS2	10	0.6868	0.649	1.79274	0.881592	0.00499216	0.395669
PRKRIR	10	0.598	0.7234	1.85693	1.11125	0.00521658	0.395669
FCHO2	9	0.6651	0.6291	0.900598	0.632709	0.00543263	0.395669
POFUT1	10	0.7528	0.5489	0.739593	0.669739	0.00544082	0.395669
FREM2	10	0.6955	0.5617	1.23678	0.904972	0.00597976	0.413319
TCF23	10	0.8378	0.8037	1.27371	1.09976	0.0067267	0.416964
LUC7L2	7	0.836	0.5684	0.938875	0.568368	0.00675803	0.416964
TSC22D3	9	0.9923	0.5954	0.771116	0.661394	0.00676684	0.416964
PFKFB1	10	0.7931	0.3909	1.47779	0.6431	0.00695458	0.420913
PIN1	10	0.6151	0.4728	1.10954	0.893127	0.00709364	0.423024
PQBP1	10	0.8639	0.9279	1.40671	1.20849	0.00736458	0.424953
PIGS	9	0.8925	1.279	1.82174	1.55129	0.00750967	0.424953
MMD	10	0.7673	0.7441	1.36886	1.08042	0.00752635	0.424953
PCDHA8	8	0.626	0.54	1.12446	0.578248	0.00753276	0.424953
MYO7A	10	1.1393	0.466	0.767295	0.722207	0.00766989	0.424953
FSTL5	10	0.8155	0.3539	1.43944	0.907318	0.00787021	0.424953
DTHD1	10	0.7553	0.3759	1.01239	0.522689	0.00787209	0.424953
SAP30L	10	0.9757	0.7669	1.97375	0.872817	0.00788001	0.424953
CLLU1	5	0.7797	0.4939	0.493938	0.464223	0.00798162	0.424953
TM2D2	10	0.6125	0.5779	1.14797	1.10481	0.00804286	0.424953
GBP5	10	0.6316	0.5873	1.19741	0.738178	0.00827382	0.424953
TMEM126B	9	0.6425	1.1045	1.40097	1.37428	0.00827906	0.424953
ARL6	8	0.5928	0.7346	1.20877	0.819169	0.00835715	0.42777
HYAL3	10	0.7564	0.7491	1.06356	0.907899	0.00873859	0.435304
LCOR	10	0.6752	0.6466	1.14726	0.892766	0.00882575	0.435304
SKOR2	10	0.8116	0.6637	1.08478	1.07328	0.00908704	0.44065
HLA-DOA	10	0.8444	0.8683	1.50838	1.31207	0.00923824	0.440682
KDM4A	9	0.6318	0.3981	1.49617	0.538349	0.00938056	0.440682
NCOA4	9	0.7018	0.6649	0.74734	0.72841	0.00946651	0.441165
PIM2	10	0.696	0.6498	0.87421	0.676001	0.0104712	0.455076
NUDT17	9	0.8744	0.9056	1.54798	1.13369	0.0106719	0.458394
ZSCAN21	10	0.6092	0.6824	1.49817	1.2821	0.0108566	0.462236
SNRPN	9	0.8017	0.4934	1.33111	0.508082	0.0109147	0.462357
LIN9	8	0.6919	0.7137	0.890049	0.817066	0.0112814	0.465929
RWDD2A	9	0.9184	0.8503	0.92665	0.923622	0.0113093	0.465929
ABCD3	10	0.951	1.0456	1.76603	1.11155	0.0113554	0.465929
TPST2	9	0.6946	0.258	0.578044	0.405928	0.0126381	0.480562
HYDIN	10	1.2668	0.7549	1.23356	0.839445	0.0127871	0.481856
NPEPPS	10	0.6999	0.7072	0.959246	0.927848	0.0131572	0.489792
MYADM	8	0.6304	0.2801	0.353369	0.291228	0.0140289	0.509304
TAOK1	10	0.7862	0.7356	1.23678	1.22936	0.0149575	0.521038
FAM81A	10	0.8783	0.5834	1.82174	0.79206	0.015018	0.521038
COX19	9	1.0713	1.5587	1.82174	1.57238	0.0151653	0.521038
STX12	9	1.0872	0.8364	1.00277	0.846546	0.0152057	0.521038
LHFPL1	10	0.9744	0.6795	2.14367	0.731356	0.0152323	0.521038
MAFK	9	0.9917	0.5841	0.935211	0.84096	0.0152689	0.521038
ASTN2	10	0.8159	0.5199	1.52308	1.03459	0.0158665	0.528092
ARHGEF6	10	0.7231	0.2097	0.881282	0.594736	0.0158665	0.528092
BPIFB1	9	0.7276	0.4432	0.713147	0.468038	0.0160766	0.528092
BRAP	10	0.6338	0.5083	0.891492	0.886283	0.0161296	0.528092
COL19A1	10	1.1259	0.8002	2.23678	1.34706	0.0165366	0.530871
CDON	9	0.8385	0.6258	0.757383	0.67909	0.0169496	0.53288
TMEM119	9	0.7948	0.7497	1.00422	0.880636	0.0169869	0.53288
AHR	10	0.5881	0.727	1.18483	1.14829	0.0172241	0.53288
YPEL2	10	0.854	0.4362	1.45917	1.02251	0.0173648	0.53288
SLC39A8	10	0.9404	0.5719	1.31961	1.25385	0.0174455	0.53288
RIPK1	10	0.8304	0.2761	1.00461	0.39577	0.0174924	0.53288
GMEB1	9	0.7931	0.7393	1.11377	1.00173	0.0176385	0.53288
CXCR4	10	0.7672	0.3002	1.23678	0.98044	0.0176617	0.53288
TMEM92	10	0.7213	0.4388	1.48327	0.736875	0.0176906	0.53288
RBM8A	9	0.9762	0.6737	1.61059	1.17538	0.0181234	0.53288
CMPK1	10	0.67	0.9493	1.57581	1.05047	0.0181333	0.53288
CELSR1	8	0.6999	0.5267	0.845589	0.532765	0.0182045	0.53288
C6orf222	10	0.9876	0.4178	2.25915	0.607618	0.0183416	0.53288
RNF169	10	1.1228	0.6057	1.49981	0.821743	0.0183632	0.53288
DNHD1	8	0.6855	0.5784	1.09382	0.603562	0.0185257	0.533676
SIRT7	10	1.1356	0.7228	1.37428	1.23678	0.0193231	0.534333
SLC16A11	9	0.6884	0.6579	1.39561	0.821743	0.0193999	0.534333
INSL4	10	0.9717	0.3146	1.34984	0.448452	0.01943	0.534333
PTPLA	10	0.5966	0.4961	1.2571	0.551161	0.0194814	0.534333
KRAS	10	0.8819	0.7171	1.1141	1.10697	0.0195083	0.534333
SLC22A8	9	0.9066	1.0441	1.37428	1.21035	0.0197404	0.534333
ADAMTS7	8	0.9387	0.7856	1.06293	0.914852	0.0201753	0.534333
SPHK2	10	0.6852	0.5035	1.52841	1.12938	0.0203513	0.534333
HNRNPAB	10	0.8099	0.5421	1.68379	1.29188	0.0204328	0.534333
PLIN1	8	0.6513	0.6549	0.958139	0.814756	0.0206571	0.534333
ITGB6	10	0.6816	0.5336	0.965782	0.912345	0.0206815	0.534333
ATP6V1C2	10	0.8595	0.5594	1.12245	1.09672	0.0208733	0.534333
NABP1	10	0.6947	0.8464	1.36296	1.15178	0.0211806	0.534519
DPP10	10	1.0079	0.6529	1.59753	1.14367	0.0219621	0.538598
CLEC12B	10	1.0624	0.5162	2.07808	0.92034	0.0220013	0.538598
MRPL22	10	0.6083	1.0374	2.1213	1.70145	0.0225164	0.540068
KIAA1107	10	1.1209	0.951	2.0987	1.56799	0.0225164	0.540068
F7	9	0.9099	0.6509	1.16105	0.892714	0.0231068	0.541355
KY	10	0.6742	0.4106	1.11997	1.0073	0.0231369	0.541355
PPP1R3A	10	0.9278	0.7363	1.41307	0.918478	0.0234883	0.544425
CD209	10	0.8087	0.8176	1.23678	0.873644	0.0239399	0.548341
GCDH	9	0.6718	0.2877	0.366368	0.328474	0.0244745	0.551341
ASB16	9	0.8588	0.7178	1.3506	0.750635	0.0247665	0.552019
FGFR1OP	8	0.7558	0.7205	1.2166	0.723895	0.0248544	0.552019
TTLL4	10	0.6994	0.408	1.38785	0.537469	0.0256125	0.559559
STS	10	0.6889	0.8237	1.01133	0.973746	0.0257909	0.559559
HYOU1	7	0.6911	1.8217	1.9868	1.82174	0.025802	0.559559
IFITM5	9	1.3566	0.3792	3.29567	0.633202	0.0266052	0.567127
SERPINA5	8	1.3302	0.3916	1.73321	0.437862	0.0270391	0.569823
TOX4	9	0.7397	1.2003	2.21169	1.55871	0.0270932	0.569823
TAS2R14	10	0.6702	0.47	1.28561	0.89328	0.0272434	0.569823
ING5	10	0.8131	0.8006	1.14162	1.04726	0.027426	0.57057
TNS3	10	0.7224	0.8367	1.20703	0.946103	0.0276818	0.574428
LAT2	10	0.8853	0.3099	1.2786	1.05122	0.0281214	0.577368
PTGDR	10	0.7504	0.0674	0.724994	0.303417	0.0291159	0.580648
SEMA5B	10	0.7548	0.4206	2.23678	1.58653	0.0292572	0.581027
TOPAZ1	9	0.6104	0.8217	1.18171	0.833815	0.0297617	0.588432
GLB1L2	9	0.8132	0.9149	1.0928	0.919923	0.029992	0.589714
CRYGS	10	0.6009	0.3505	1.04277	0.654808	0.0306195	0.590027
TMEM8B	9	0.864	0.6423	1.38117	1.3437	0.03118	0.590027
CSRNP1	9	0.7426	1.1266	1.82174	1.13838	0.0314055	0.593548
TCF7L1	9	1.1137	1.1186	2.76403	1.89547	0.031956	0.595261
SLC35G1	10	0.7953	0.4361	1.74774	0.635329	0.0321464	0.595261
SNX13	10	0.7903	0.6775	1.14291	1.01468	0.0329677	0.598914
TEF	9	0.8818	0.5519	2.58728	0.742887	0.033022	0.598914
ZNF217	10	0.8569	0.2942	1.04413	0.64945	0.0333109	0.600607
POLR3K	8	0.9726	1.1917	2.69621	2.61865	0.033543	0.602436
PPIAL4F	10	0.6199	0.24	1.15432	0.980682	0.0335568	0.602436
FAM69C	9	0.8819	1.0946	2.20005	1.11386	0.0337486	0.604324
EEF1B2	10	0.907	0.9186	1.28117	1.2447	0.0339108	0.605498
TMEM164	9	0.7385	0.5918	1.4709	0.859363	0.0341689	0.607716
ARHGAP5	10	0.6742	0.2683	1.03325	0.812842	0.0349093	0.610317
CX3CL1	10	0.6282	0.7152	1.66128	1.07792	0.0349968	0.610974
COL15A1	9	0.7166	0.1678	0.421205	0.343695	0.0361219	0.611935
ABCA3	7	1.3052	0.7582	2.46944	0.758207	0.0367314	0.616363
PAX4	8	0.6373	0.4435	0.749665	0.653798	0.0371755	0.62072
LAMB2	10	0.7879	0.748	1.77695	1.51431	0.0381172	0.626471
HAPLN4	10	0.6689	0.2368	0.49312	0.279008	0.038369	0.626471
FAM229B	10	0.7817	0.2481	0.660699	0.608749	0.0384714	0.626471
C20orf201	9	0.966	1.0441	1.58568	1.33914	0.0384851	0.626471
ALDOB	9	0.6001	0.6304	1.07176	0.715407	0.0392938	0.630172
NUMA1	8	0.7975	0.5278	1.40671	0.577817	0.0395348	0.630198
RCAN1	10	0.6183	0.6175	1.27942	1.00617	0.0413932	0.638624
C8orf47	10	0.5949	0.3082	1.30816	0.666768	0.0425328	0.638812
SMOC1	10	0.7229	0.2221	0.723519	0.381897	0.04371	0.640925
FBXO25	10	0.8806	0.7753	2.44883	2.12685	0.0437296	0.640925
GRIA4	10	0.7177	0.5606	1.82174	0.758507	0.0444088	0.646383
TSFM	8	0.7945	0.5755	0.973746	0.821743	0.0452348	0.651204
NPRL3	10	0.5884	0.6828	1.43347	1.43003	0.0455368	0.653333
BAG1	10	0.634	0.2522	1.69621	0.751014	0.0457908	0.653351
PYGB	10	0.873	0.4479	1.12046	0.926395	0.0462498	0.654938
CDCP1	10	0.5925	0.4227	0.728703	0.727415	0.0465135	0.656696
ELF1	10	0.6499	0.3941	0.766985	0.673785	0.0465429	0.656696
IL3RA	10	0.7027	0.4777	0.636789	0.536484	0.0467833	0.658074
MAP1A	9	0.6729	0.6345	1.12513	0.752421	0.0471809	0.659638
ARL1	9	1.2847	0.9618	2.96571	0.973746	0.0475103	0.661232
NOTUM	10	0.9615	0.6192	0.931277	0.697116	0.0478004	0.663267
RGPD2	9	0.676	0.6613	1.49981	0.821743	0.0486288	0.670599
SIAE	10	0.7073	0.2777	0.903975	0.651818	0.0498941	0.67466

## Sheet: OVCAR8_8d
Gene_symbol	number_of_sgRNAs	mean_enrichment	median_enrichment	enrichment_3rd_sgRNA	enrichment_4th_sgRNA	ks.pvalue	bh
ACSL4	8	1.3507	1.1842	2.61428	1.53182	0.0143463	0.858347
PEX1	7	0.7877	0.5801	0.666745	0.58013	0.00251358	0.668732
CHP1	7	1.2799	1.4568	1.58731	1.45682	0.000113414	0.376484
KEAP1	8	1.7277	1.5211	2.0508	1.6313	0.000213818	0.376484
AGPS	8	1.0904	1.5488	2.06728	1.6561	0.00280946	0.6869
MLLT1	10	0.797	0.785	1.24277	1.13306	0.000794877	0.521055
SMG9	7	1.2552	1.1992	1.75867	1.19924	0.00267446	0.684971
TXNRD1	7	1.2331	1.3423	1.66675	1.34231	0.00163328	0.598515
UCK1	7	0.6802	1.9521	2.17771	1.95215	0.0255998	0.862735
PHKA1	10	0.6598	0.9	1.12618	0.92978	0.00453955	0.725692
CDKN2A	10	0.8473	0.5709	1.27009	0.944658	0.00725173	0.756295
BRI3BP	10	0.6388	0.2599	1.51474	0.394902	0.0377247	0.888326
MMD	9	0.7489	1.2069	1.32833	1.22256	0.0122292	0.858347
FSTL5	9	0.9858	1.2517	1.49613	1.3221	0.00201514	0.605787
OTOP1	7	0.8507	0.9679	1.57364	0.967915	0.0439373	0.888326
ABCD3	8	0.7944	0.9818	1.28413	1.05377	0.0452025	0.888326
LHFPL1	7	0.6132	0.4533	0.628943	0.453342	0.0482227	0.888326
HIST1H4E	10	0.818	0.6747	1.25171	1.16925	0.0425527	0.888326
YPEL2	8	0.849	1.0777	1.25171	1.25171	0.0216994	0.858347
CMPK1	10	0.7154	1.0861	1.33917	1.19924	0.019673	0.858347
MCRS1	5	1.1991	1.4037	1.40371	0.766281	0.0298026	0.880918
CACNG7	7	0.7088	0.7024	0.711139	0.702369	0.000677263	0.478743
SYK	8	0.5939	0.2107	0.370352	0.310601	0.0477234	0.888326
TGIF2LX	4	1.1469	1.0557	1.0524	0.487336	0.0120044	0.858347
TAS2R14	10	0.6606	0.3881	1.51474	0.568898	0.0143439	0.858347
GRAMD1B	9	0.6034	0.3023	0.946081	0.883976	0.0256789	0.862735
ZNF701	9	0.8066	0.7942	1.57364	1.1142	0.0437623	0.888326
AGPAT3	7	1.4481	1.0942	1.38362	1.09417	0.00348185	0.725692
TMEM164	9	1.2982	0.9298	2.16472	1.10319	0.000102483	0.376484
LPCAT1	9	0.9321	0.2517	2.21323	1.63022	0.0298092	0.880918
LPCAT3	8	1.3497	1.775	2.05906	1.83667	0.00063153	0.478743
DNAH3	8	1.0039	1.2045	1.25781	1.25171	0.000847156	0.521055
FCRL5	7	0.7758	2.0591	2.12618	2.05906	0.0176035	0.858347
MRPS10	4	2.0632	1.8499	1.57364	0.868379	0.00306705	0.725692
TNFSF15	7	1.1675	0.9298	1.44435	0.92978	0.0044713	0.725692
HSPBAP1	10	1.3484	1.5342	2.32971	2.3106	0.00202259	0.605787
CPM	9	0.7614	0.6143	0.92978	0.737135	0.00061719	0.478743
BIRC6	9	0.8226	0.8081	1.66051	1.08178	0.0281052	0.867166
CXCL3	10	0.7133	0.6387	0.988673	0.815609	0.0344784	0.888326
NOX4	9	0.8748	1.0293	1.68781	1.1586	0.0101928	0.831128
FOXS1	6	0.9211	0.441	0.573636	0.308291	0.00614171	0.756295
SUSD4	9	0.5868	0.4741	0.914673	0.749207	0.0333668	0.888326
SFT2D3	6	0.6068	0.509	0.666745	0.351243	0.031054	0.888326
PRKCE	10	0.5977	0.6992	1.12242	0.876416	0.0186333	0.858347
C1orf204	8	0.7455	1.0704	1.33917	1.25171	0.0486962	0.888326
FCF1	6	0.8065	1.0072	1.17771	0.83667	0.0145192	0.858347
SYNGR1	10	1.2531	1.139	1.44435	1.43613	4.99e-05	0.376484
UGT1A10	4	1.0937	0.5398	0.52301	0.236111	0.0365304	0.888326
OXCT1	9	0.8852	1.1262	1.76628	1.35862	0.0389544	0.888326
ADAM32	10	0.9116	0.9517	1.72119	1.13805	0.00961636	0.82621
2019-03-04	6	0.7012	0.5736	0.573636	0.573636	0.0228139	0.858347
NPFFR1	10	0.6485	1.0239	1.83667	1.65381	0.0107068	0.841264
FAR1	8	1.0497	1.3219	1.87974	1.61944	0.0320112	0.888326
KSR1	9	0.6942	0.8081	1.66675	1.25171	0.0069106	0.756295
MAPKAP1	10	0.8667	0.8183	1.83667	0.972992	0.00225075	0.631353
PEX10	9	0.6742	0.8173	2.46116	1.28647	0.0280911	0.867166
NAGS	7	1.2581	0.9147	2.74647	0.914673	0.0283785	0.867166
ZNF696	7	0.8702	0.6302	0.680551	0.630219	0.0130224	0.858347
EVL	8	0.6602	0.8249	1.02932	0.999521	0.00680059	0.756295
PTN	8	0.7103	0.6862	0.83667	0.821073	0.00359932	0.725692
FOXB2	7	0.9953	0.8981	1.29751	0.898071	0.0341771	0.888326
SH3BP5	9	0.9418	0.5692	1.25171	0.687807	0.00219388	0.625327
LCLAT1	9	0.8163	0.8246	1.25171	0.882474	0.0222872	0.858347
SH2D5	9	0.8704	0.383	1.3221	1.01724	0.019965	0.858347
USP9X	6	1.9381	2.6262	2.97417	2.27818	0.00764148	0.757342
TRPC4	7	0.7654	0.7562	0.758668	0.75618	0.0377278	0.888326
PPP4R2	9	0.6842	1.1692	1.63022	1.25171	0.00782422	0.763921
TIMM17B	9	0.6915	0.9038	1.25171	1.1586	0.0203253	0.858347
PAOX	6	1.0723	1.427	1.57364	1.28028	0.0261353	0.867166
SLC26A4	10	0.8208	0.6131	1.57364	1.42163	0.0107068	0.841264
TDRD3	7	0.6902	0.8367	0.9716	0.83667	0.0407149	0.888326
SLC39A10	9	0.6231	0.755	1.38921	0.988673	0.0168162	0.858347
TUBB4A	7	0.8647	1.4582	1.83667	1.45816	0.0145957	0.858347
GTF2H2D	7	0.9542	0.8891	1.71114	0.889138	0.0341771	0.888326
PPP2R3B	8	0.8315	0.8094	1.31882	0.83667	0.0149387	0.858347
PCDHAC2	9	0.6699	0.7007	1.1142	0.83667	0.00600665	0.756295
ARHGAP12	8	0.8477	0.7301	0.761902	0.737135	0.0143463	0.858347
LMO1	10	0.7267	1.1569	1.76628	1.6116	0.0256526	0.862735
CTBP2	7	0.673	0.8367	1.25171	0.83667	0.035845	0.888326
RXFP3	9	0.7595	0.6093	1.40925	0.83667	0.0424018	0.888326
SCP2D1	10	0.7534	0.7487	1.95215	1.32571	0.0344293	0.888326
VIPR2	9	0.968	1.0387	1.57364	1.16925	0.00190043	0.598515
ETV4	6	1.0161	1.4449	1.51474	1.37509	0.0227646	0.858347
KRTAP9-6	9	1.1001	1.0293	1.73713	1.04526	0.00184052	0.598515
TRIP13	10	0.8546	0.5442	1.53182	1.03758	0.0483969	0.888326
RCAN3	9	1.1105	1.2517	1.57364	1.43757	0.000174427	0.376484
RBMXL1	7	0.7158	0.9887	1.00303	0.988673	0.0198676	0.858347
TCEA1	10	0.7002	0.587	1.05906	0.977533	0.0148045	0.858347
USP20	8	1.1696	0.6438	0.988673	0.813587	0.0143463	0.858347
C2orf70	8	1.0195	0.9814	1.35124	1.25171	0.00556861	0.728952
FAM203A	6	0.7259	0.8669	1.01252	0.721193	0.00981803	0.82621
DCAF7	6	0.953	0.9127	0.988673	0.83667	0.00973902	0.82621
EIF2S3	5	0.8967	0.7111	0.711139	0.666745	0.00709362	0.756295
MAGOH	4	1.5327	1.4976	1.42163	0.251708	0.0326515	0.888326
HIST2H2AC	5	1.5641	0.6667	0.666745	0.508866	0.0148475	0.858347
XRCC3	6	1.1683	1.2476	1.57364	0.921559	0.013516	0.858347
MDH2	8	0.7743	1.1889	1.35124	1.25171	0.00677654	0.756295
NYNRIN	5	0.7648	0.7593	0.759311	0.666745	0.0419653	0.888326
DUSP23	9	0.8562	0.9521	1.09124	0.974174	0.00100102	0.570646
NUMBL	8	0.7808	0.7387	1.46989	0.895564	0.0333622	0.888326
ZNF576	8	0.6911	0.8702	0.956252	0.903784	0.00677654	0.756295
TMEM203	8	1.0456	0.7403	0.988673	0.83667	0.0160646	0.858347
CLEC1B	9	0.6704	0.6811	0.988673	0.889138	0.019732	0.858347
CAPN15	7	0.6993	0.8911	1.95215	0.891118	0.0439373	0.888326
GRB14	7	0.9507	0.6667	1.71114	0.666745	0.0439868	0.888326
USP2	8	0.8416	0.3862	0.573636	0.4741	0.0442143	0.888326
TAB2	8	0.6763	0.973	1.21694	1.0107	0.0416333	0.888326
ZIK1	9	0.7394	0.3023	0.92978	0.83667	0.0118666	0.858347
MAN2C1	7	0.6997	1.3392	2.36718	1.33917	0.0243753	0.860216
FGFBP2	7	0.7381	0.8618	0.988673	0.861761	0.021043	0.858347
PHF15	10	0.6721	0.5102	0.666745	0.630219	0.000586448	0.478743
CNN3	9	0.7521	1.0591	1.25171	1.14479	0.00837246	0.799773
PGBD4	8	1.0003	0.7149	0.766281	0.725639	0.00165953	0.598515
MRPL10	5	1.5726	1.3512	1.35124	1.0107	0.000485859	0.478743
TCEB3	9	0.812	1.2517	1.42163	1.32971	0.00686594	0.756295
UNK	5	1.2642	1.5736	1.57364	0.541214	0.0148475	0.858347
DSC2	9	0.6959	1.2602	1.57364	1.37035	0.0184616	0.858347
POP5	6	0.8761	1.1927	1.35604	1.02932	0.0473477	0.888326
C15orf61	7	0.9351	1.0591	1.22825	1.05906	0.0136721	0.858347
B4GALT6	9	0.8187	0.7111	1.25171	0.766281	0.0203115	0.858347
ATP2B4	8	0.8257	0.6933	1.1586	0.83667	0.0457759	0.888326
TMCC3	8	0.631	0.7611	0.933967	0.811135	0.0425055	0.888326
CR1	10	0.804	0.489	1.4741	0.83667	0.0311591	0.888326
ZNF793	9	0.6808	0.7587	1.01724	0.846866	0.00600665	0.756295
PDYN	8	0.5974	0.5528	0.858171	0.587311	0.0473218	0.888326
THAP8	8	0.8033	1.1097	1.44435	1.20864	0.0333016	0.888326
ATF3	8	0.7048	0.8643	1.53182	1.32496	0.0446525	0.888326
GRPR	7	0.8395	0.5114	0.536161	0.511352	0.0246382	0.860216
CD1D	9	0.7668	0.8684	2.05906	1.0997	0.0234625	0.858347
ZSCAN30	9	0.9763	0.8532	1.68983	0.903784	0.023108	0.858347
CNBD1	8	0.8234	1.0794	1.25171	1.0997	0.00978369	0.82621
TMEM41B	4	0.6906	0.6567	0.271073	0.19726	0.0401822	0.888326
CREBL2	9	0.8998	0.5927	1.83667	0.782222	0.00635024	0.756295
C14orf180	9	0.6593	0.6847	0.83667	0.689829	0.0109572	0.853019
XDH	7	0.8602	0.4135	0.666745	0.413459	0.00748934	0.756295
CCR1	7	0.8683	0.8187	1.1586	0.818748	0.00482835	0.725692
R3HCC1L	9	0.6166	0.6704	1.06295	0.727441	0.00651595	0.756295
APOA5	8	0.6532	0.5898	1.05348	0.644025	0.019571	0.858347
ARPP21	10	0.991	0.7128	1.25171	0.825944	0.0469218	0.888326
TLR1	8	0.7655	0.5617	1.21245	0.711139	0.0254875	0.862735
SCTR	8	0.7013	1.2647	1.62452	1.2777	0.00193048	0.598515
CDK5	9	0.7157	0.5513	0.809703	0.558889	0.00747054	0.756295
GCC2	7	1.225	1.5235	1.8097	1.52351	0.0438248	0.888326
ACRBP	6	1.2373	1.3629	1.4741	1.25171	0.00173876	0.598515
PKD1	4	1.3403	1.1499	0.463212	0.251708	0.0362931	0.888326
MAP1B	8	0.9079	0.4208	1.78222	0.49682	0.0143463	0.858347
TEX26	9	0.7832	0.9414	1.38921	0.988673	0.0152386	0.858347
ACOT8	7	0.8957	0.5028	0.988673	0.50284	0.0341771	0.888326
EZR	5	1.197	1.5736	1.57364	0.737135	0.0148475	0.858347
PRAMEF19	8	0.7389	0.7206	1.0402	0.916524	0.00440801	0.725692
ATXN10	5	1.1696	0.9521	0.952147	0.599631	0.00283746	0.6869
HYLS1	10	0.715	0.3449	1.21854	0.563652	0.0233522	0.858347
MIS18A	5	1.2994	1.4741	1.4741	1.4741	0.00545758	0.728952
HLA-B	6	0.727	0.5198	0.627465	0.412172	0.0270887	0.867166
ZBTB6	10	1.1835	0.8419	2.38921	1.83667	0.047123	0.888326
SLC17A6	9	1.2423	0.8367	1.88398	1.15217	0.00185656	0.598515
KCTD4	10	0.7665	0.9127	1.31584	0.988673	0.0456087	0.888326
CXXC5	7	0.8318	0.8367	1.25171	0.83667	0.0283785	0.867166
REG4	7	1.0885	0.9298	1.38921	0.92978	0.0312584	0.888326
TRAM1L1	9	0.9171	0.9012	1.33917	1.0997	0.00425313	0.725692
FBL	5	0.87	1.0818	1.08178	0.638731	0.0445989	0.888326
TMEM116	9	0.9813	0.9622	1.19281	1.01355	0.000585875	0.478743
EIF2S2	5	0.6669	0.5318	0.531816	0.492716	0.0227976	0.858347
BRD7	7	1.0381	1.0997	1.4741	1.0997	0.03667	0.888326
COX8A	7	0.89	1.4393	1.53182	1.43933	0.00434025	0.725692
NOS1	8	1.1425	1.4071	1.57364	1.50805	0.014983	0.858347
ANKRD46	10	0.6861	0.6452	1.4741	1.27479	0.0248079	0.860216
GATSL3	6	0.8983	0.4398	0.481713	0.397928	0.0304937	0.888326
ZNF326	10	0.8839	0.7648	1.02932	1.0243	0.000255648	0.376484
CNTD2	8	0.7163	1.1554	1.36718	1.3221	0.00165953	0.598515
NR0B1	9	0.5938	0.7822	1.02932	1.02932	0.0308746	0.888326
DEFB136	9	0.7924	0.6454	1.86314	1.10732	0.0298092	0.880918
FBLN7	8	1.0293	1.0442	1.8097	1.42163	0.019571	0.858347
PEX11G	7	0.7357	0.477	0.666745	0.477	0.0415023	0.888326
AIPL1	8	0.6144	0.4454	1.16317	0.556562	0.0157255	0.858347
ZNF383	8	0.6228	0.6177	1.38921	0.761382	0.0364574	0.888326
OAZ3	4	0.7784	0.6652	0.535501	0.420684	0.0154787	0.858347
FOXD3	8	1.1584	1.0382	1.83667	1.33917	0.0234865	0.858347
TRPC7	8	0.9483	1.3305	1.56365	1.51474	0.0228975	0.858347
ACAP2	8	1.1009	0.786	1.83667	0.805643	0.0143463	0.858347
WSB1	10	0.7187	0.5442	1.36718	1.16925	0.0376648	0.888326
MEGF10	9	0.6075	0.528	0.957977	0.654672	0.022857	0.858347
SCGN	8	0.7233	0.436	1.17285	0.701873	0.0048452	0.725692
BPY2C	10	0.6534	0.661	1.23033	0.711139	0.0229532	0.858347
RNF220	9	0.7839	1.2517	1.66675	1.3821	0.0136238	0.858347
SLC40A1	9	1.1065	1.0402	1.4741	1.2028	0.00184052	0.598515
CCDC178	10	0.6614	0.7295	1.02223	0.92978	0.0128882	0.858347
FPR2	9	0.6937	0.2517	0.876199	0.573636	0.00240082	0.652728
LEPROTL1	7	0.9627	0.7768	0.94717	0.776799	0.0311648	0.888326
GRAMD2	8	0.7132	0.692	0.848949	0.730876	0.00170751	0.598515
NPR1	7	1.1862	1.5736	1.8081	1.57364	0.00708222	0.756295
TRPM7	5	0.7355	0.8367	0.83667	0.514742	0.0148475	0.858347
APOB	9	0.6063	0.4946	0.903784	0.666745	0.0122292	0.858347
TRAPPC6A	9	0.6027	0.9622	1.02223	0.967915	0.0228516	0.858347
RAB39A	8	0.6285	1.0667	1.51474	1.14479	0.0368094	0.888326
YDJC	7	0.875	0.9456	1.00017	0.945605	0.0155369	0.858347
HAS1	8	0.6524	1.1807	1.25171	1.25171	0.025085	0.862735
C15orf54	6	1.0674	1.0562	1.07483	1.03758	0.0460838	0.888326
SEMA6B	7	0.8309	0.8891	1.71737	0.889138	0.0336367	0.888326
CYP2C8	8	0.8855	0.5312	0.75094	0.588233	0.0199581	0.858347
HSP90B1	5	1.673	2.4996	2.49964	0.285655	0.0414915	0.888326
OSBPL9	7	0.8787	0.9521	1.25171	0.952147	0.0188203	0.858347
PSG8	7	1.0986	1.2857	1.3372	1.28566	0.0087839	0.821479
ENO3	8	0.7769	0.7268	0.92978	0.83667	0.0052121	0.728952
PLCB2	8	0.7771	0.6729	0.92978	0.679129	0.0343277	0.888326
SORT1	8	0.7043	0.761	1.89556	0.907753	0.0190079	0.858347
FIGF	8	0.7039	0.6326	1.0107	0.679129	0.00767113	0.757342
APEX2	5	1.3657	2.4216	2.42163	0.251708	0.0434263	0.888326
CCDC122	6	0.8108	0.9449	1.06615	0.823614	0.0273765	0.867166
ART4	10	0.7094	0.4944	1.13805	0.666745	0.0217482	0.858347
MEIOB	8	0.9206	0.4389	1.48734	0.626103	0.0364574	0.888326
WDSUB1	7	1.0014	1.2517	1.41217	1.25171	0.00385719	0.725692
PIGQ	6	0.6579	1.2701	1.51799	1.02223	0.0478311	0.888326
LRRC49	8	0.6226	1.0907	1.32971	1.25171	0.043446	0.888326
RALGAPA1	6	0.6431	1.061	1.08178	1.0402	0.0343098	0.888326
ARHGEF35	6	0.7187	0.7052	0.83667	0.573636	0.038063	0.888326
SLFN5	10	0.6549	0.8031	1.25171	1.25171	0.0339458	0.888326
SLC2A4RG	7	0.9062	1.2517	2.05906	1.25171	0.00702474	0.756295
UPK3BL	6	1.5053	1.2453	1.66675	0.823846	0.0146961	0.858347
LINGO4	7	1.167	1.1032	1.19924	1.10319	0.00357173	0.725692
GMEB2	6	0.7622	0.779	1.06529	0.492716	0.0438007	0.888326
ADCY3	6	1.1077	1.3661	1.38099	1.35124	0.0237918	0.860216
EBI3	8	1.1842	1.176	2.25171	1.4741	0.0138365	0.858347
ADAM30	9	0.69	0.6817	1.98867	1.25171	0.0389544	0.888326
PPP3CB	7	0.7283	0.3985	0.488747	0.398549	0.017886	0.858347
AARD	9	0.8781	1.3023	1.77366	1.30233	0.0286656	0.868976
RNF32	9	0.7748	1.3821	1.75421	1.57364	0.0283443	0.867166
SCN10A	10	0.8151	0.9658	1.54121	1.15217	0.036272	0.888326
TBL1Y	7	0.7752	0.884	0.952147	0.883976	0.0113759	0.858347
SLC45A4	7	0.6515	1.0795	1.16925	1.07953	0.0370676	0.888326
GALNT14	8	0.6809	0.6131	0.857887	0.752137	0.0234279	0.858347
PHRF1	8	1.1444	1.5777	2.45334	2.25171	0.0400632	0.888326
VWC2	8	0.6433	0.957	1.2059	1.06615	0.0209209	0.858347
TACO1	7	1.0417	1.0748	1.40371	1.07483	0.0341771	0.888326
GTF2A1L	6	0.8089	0.8384	0.879739	0.797142	0.0186067	0.858347
JARID2	5	1.1316	1.3966	1.39658	0.895564	0.0156532	0.858347

## Sheet: OVCAR8_12d
Gene_symbol	number_of_sgRNAs	mean_enrichment	median_enrichment	enrichment_3rd_sgRNA	enrichment_4th_sgRNA	ks.pvalue	bh
ACSL4	6	3.7584	4.2362	4.39218	4.08018	2.67e-05	0.108762
CHP1	8	2.2224	2.546	2.8824	2.7985	0.000148802	0.287105
KEAP1	10	2.6057	3.0066	4.15879	3.71966	3.4e-06	0.0583082
AGPAT6	7	2.2033	1.7489	2.13903	1.74891	5.78e-05	0.16531
AGPS	7	1.7634	1.7282	2.56645	1.72822	0.00614577	0.791493
ELFN1	6	0.8012	0.5138	0.743751	0.283795	0.0449875	0.840619
MAF	6	0.7885	1.4487	2.04533	0.852165	0.0197091	0.796475
MLLT1	10	1.898	1.9009	3.00541	2.27481	1.54e-05	0.108762
TXNRD1	5	1.0845	1.027	1.027	0.94401	0.0222825	0.815296
AEBP2	10	1.7941	2.3421	3.43839	3.17499	3.17e-05	0.108762
KCNJ13	7	0.7845	0.9982	1.41033	0.998202	0.0213026	0.799968
PEX3	8	1.5047	1.4569	1.82537	1.50344	0.000463249	0.405046
CHST11	9	0.6124	0.4103	1.41033	0.788839	0.0137255	0.791598
LUC7L2	6	0.85	1.7438	1.81422	1.67336	0.0103676	0.791598
BRI3BP	8	1.1919	1.4185	2.22305	1.47405	0.00553141	0.791493
MMD	7	1.9132	1.8254	1.97474	1.82537	0.000339907	0.405046
ARL6	6	0.9994	1.2678	1.51582	1.01969	0.0053515	0.791493
CASP2	8	0.8839	0.2432	1.69845	0.281045	0.00308255	0.740329
THEM5	10	0.6826	0.3099	1.82537	1.57383	0.0111675	0.791598
PDE8B	8	0.6028	0.2285	0.588828	0.231004	0.00629014	0.791598
ABCD3	8	1.2472	1.2569	2.44595	1.35143	0.00171647	0.701412
PEX12	7	2.385	1.8958	2.56645	1.89575	7.51e-05	0.184303
AHR	9	1.0762	0.9551	2.41476	2.15879	0.0247122	0.831181
KMT2A	7	0.677	1.5954	1.99529	1.59536	0.0353666	0.837809
TXNRD3	6	0.9198	1.7697	1.86601	1.67336	0.0225405	0.815338
TGDS	8	0.8146	0.8754	1.9249	1.34827	0.0423869	0.840619
LIG3	4	1.8071	1.9964	1.20388	0.0883994	0.0324956	0.837809
IDH1	6	1.0998	0.9024	1.27282	0.532006	0.00780011	0.791598
C12orf5	9	0.6319	0.5034	1.57383	0.715356	0.00210025	0.714018
AGPAT3	7	2.4558	2.9953	3.00896	2.99529	0.000214808	0.335256
TMEM164	8	1.1207	1.192	1.7307	1.55872	0.00929679	0.791598
CDK2AP1	6	1.0761	1.076	1.2404	0.911522	0.00391145	0.791493
TIPIN	7	0.6018	1.0884	2.46691	1.0884	0.0274409	0.837809
PEX2	7	1.7302	2.1514	2.3187	2.15141	0.000710965	0.508472
LPCAT3	9	1.7052	1.9617	2.59619	2.48072	0.0018082	0.701412
PEX19	10	0.6007	1.1388	1.94638	1.82537	0.0122367	0.791598
KPNA1	7	0.8708	0.8458	1.0884	0.845829	0.0069337	0.791598
VASH2	8	0.716	0.2473	1.94084	0.358851	0.0322737	0.837809
PCYT2	7	0.6746	0.7558	0.895754	0.755824	0.0380632	0.837809
PROL1	7	0.6906	0.6145	1.53906	0.614468	0.0348891	0.837809
GPR83	6	0.7398	1.1091	1.20388	1.0144	0.00510187	0.791493
PTDSS2	10	0.6007	0.6368	2.06929	0.756778	0.0443273	0.840619
F10	9	0.7839	0.8958	1.82537	1.0884	0.0141602	0.791598
BRPF1	4	2.0398	1.5377	1.45097	0.825365	0.00441359	0.791493
POM121L12	7	1.8107	2.6245	2.78884	2.62445	0.00343124	0.74624
KIAA0319L	7	0.8536	0.9377	1.85779	0.937668	0.033223	0.837809
CDCA7L	6	0.7249	0.587	0.740476	0.433535	0.0181024	0.796475
DNAJC19	6	0.7872	0.7959	0.825365	0.766471	0.0301413	0.837809
PLXNA4	8	0.6269	0.821	1.61515	0.825365	0.0201582	0.796475
SLC12A3	10	0.7855	0.7275	1.50344	1.41033	0.000471862	0.405046
IRF2	7	0.8316	0.852	1.64422	0.851959	0.0485053	0.840619
BRE	7	0.7057	1.1624	1.45097	1.1624	0.0187471	0.796475
DLG4	6	1.052	1.4292	1.52897	1.32941	0.0370251	0.837809
CD34	9	0.8047	1.3025	1.5245	1.41033	0.0127658	0.791598
BBIP1	10	0.7545	1.1145	1.35722	1.25832	0.0239331	0.824284
GGTLC1	7	0.9187	1.5034	1.50924	1.50344	0.00970879	0.791598
EDIL3	8	0.9883	0.7863	0.945795	0.872671	0.0136571	0.791598
FAR1	6	1.5964	1.272	1.28104	1.2629	0.000369458	0.405046
VSTM4	7	1.2169	1.3722	1.38796	1.37219	0.0142218	0.791598
PEX10	7	2.6134	3.1637	3.89575	3.16369	0.000329124	0.405046
RBM20	8	0.8121	0.7583	0.936396	0.843287	0.00254345	0.715273
NAT9	6	0.9854	1.1908	1.7083	0.673362	0.0267472	0.837809
TMPPE	8	1.4515	1.3331	2.41033	1.66264	0.0485691	0.840619
CNTNAP2	4	1.2315	1.2857	1.01344	0.310792	0.0162799	0.796475
2019-09-14	8	0.8369	0.8112	1.43755	0.825365	0.0306898	0.837809
MTCH1	7	1.5005	2.1208	3.52136	2.12082	0.0304744	0.837809
AXL	8	0.9882	1.2199	1.67336	1.35143	0.000263179	0.376522
TIMM9	4	1.6885	1.8101	1.69845	0.310792	0.0162799	0.796475
KAT7	7	1.2648	1.5478	1.55971	1.54783	0.00441027	0.791493
TLR3	9	0.7021	0.4329	1.97822	1.11815	0.0267455	0.837809
TTPA	7	1.8978	1.5275	2.41033	1.52751	2.31e-05	0.108762
MS4A5	9	0.5881	1.0213	1.37791	1.0884	0.0248463	0.833129
LOR	6	1.2603	1.0264	1.34779	0.705071	0.0494016	0.840619
CADPS	7	0.7438	1.2039	1.20814	1.20388	0.0444117	0.840619
TRIM42	7	0.7266	0.8958	1.23726	0.895754	0.0289786	0.837809
CSGALNACT1	8	1.0164	0.7924	1.19802	0.878946	0.0121507	0.791598
ABCD4	4	1.3832	1.4144	1.0884	0.0883994	0.0324956	0.837809
C1orf158	6	0.9187	0.7528	1.04533	0.460368	0.0460355	0.840619
SMYD3	10	0.6065	0.831	1.52136	1.51541	0.0299248	0.837809
METTL2A	7	0.7498	0.8254	1.0884	0.825365	0.0104758	0.791598
KCNJ5	9	0.8318	0.3108	0.747363	0.716431	0.00261932	0.715273
CYP4F8	5	1.8983	1.8254	1.82537	0.602973	0.00850149	0.791598
DHX34	8	0.996	1.7725	2.29003	2.24594	0.02536	0.836563
FAM45A	9	0.6374	0.603	1.67336	0.825365	0.0198946	0.796475
RASA1	7	0.8582	0.8539	1.72583	0.853934	0.0467861	0.840619
SECISBP2	6	1.2074	1.2973	1.33633	1.25832	0.0077513	0.791598
ZNF562	10	0.8455	0.9767	2.0884	2.01373	0.0328869	0.837809
TPTE	7	0.8107	1.1664	1.85393	1.1664	0.0293374	0.837809
ZNF787	6	1.3413	1.745	1.86099	1.62897	0.00414566	0.791493
ASMTL	8	1.1725	1.35	1.96287	1.71845	0.0194792	0.796475
LYRM1	7	1.5207	1.0884	1.65544	1.0884	0.00417181	0.791493
AKAP6	7	1.2731	2.2039	2.44595	2.20388	0.0285876	0.837809
PMF1-BGLAP	5	1.0112	0.9249	0.924901	0.573826	0.0341092	0.837809
RCAN3	8	0.7972	1.273	1.71133	1.50344	0.0451205	0.840619
RIPK3	6	0.865	0.8467	1.32719	0.366253	0.0123043	0.791598
TCEA1	10	1.0276	0.8202	1.74048	1.48072	0.000150509	0.287105
PIGO	6	1.2305	1.3958	1.89575	0.895754	0.0134713	0.791598
USP20	7	0.9935	0.8046	2.0884	0.804606	0.00352028	0.74624
APLP2	9	0.8426	0.9297	1.67336	1.41033	0.0180479	0.796475
GRIA3	8	1.8969	1.2115	2.18794	1.31079	0.00140292	0.633823
DCAF7	6	1.6751	1.9161	2.35143	1.48072	0.00173016	0.701412
ERI2	8	0.627	0.8049	1.32719	1.0884	0.0111403	0.791598
ARHGEF37	9	0.866	0.4843	1.5909	0.895754	0.00261932	0.715273
RNF7	6	0.6914	1.653	1.99529	1.31079	0.0388185	0.840619
EPT1	5	1.8403	1.8958	1.89575	1.45966	0.000905135	0.508472
OXLD1	9	0.6438	0.4272	0.915563	0.673362	0.0402094	0.840619
KCTD21	7	0.875	1.2039	2.0884	1.20388	0.0185085	0.796475
RRM2B	6	1.3912	1.2672	1.57383	0.960644	0.0160898	0.796475
DNAJC1	6	0.6568	0.3268	0.407678	0.245941	0.00473971	0.791493
DLGAP1	8	0.7677	1.046	2.54783	1.35143	0.0294226	0.837809
TNRC18	5	1.1249	0.7793	0.779295	0.673362	0.0129704	0.791598
SNTN	9	0.6559	0.1846	1.41033	0.249863	0.00996633	0.791598
LIMA1	9	0.9425	0.8301	1.4389	0.947537	0.00608278	0.791493
SULT1A1	8	0.8157	0.6452	1.27162	0.751364	0.0210625	0.796475
CRIPT	7	0.9259	1.5034	1.69983	1.50344	0.0390221	0.840619
PEX13	9	0.9853	1.0561	1.92334	1.61565	0.022796	0.815338
ZIK1	9	0.8456	0.0884	1.70473	1.58194	0.0241052	0.824284
NAT6	9	0.8529	0.7558	1.0144	0.895754	0.0069294	0.791598
YIPF6	7	0.7315	0.5453	0.766471	0.545257	0.00513032	0.791493
KANSL1	8	1.1659	1.8471	2.89575	2.0884	0.0139262	0.791598
ABHD14B	8	0.7711	0.9379	1.67336	0.945035	0.0274652	0.837809
GAS2	7	1.0166	1.3614	1.50344	1.36142	0.0298704	0.837809
CYP27C1	7	0.6468	0.6734	1.07219	0.673362	0.0435092	0.840619
TCEB3	8	1.0815	1.012	1.64639	1.2404	0.00446769	0.791493
FOXO3	9	1.2815	1.529	3.2848	2.18794	0.00371156	0.777074
RBM18	10	0.6109	1.1366	2.23524	1.41033	0.0401578	0.840619
SNX8	4	1.3051	0.5135	0.353542	-0.104246	0.0488207	0.840619
RECK	9	0.8451	1.3108	2.13022	1.45763	0.00732767	0.791598
CCR6	9	0.9382	0.6734	2.17182	0.924901	0.00261932	0.715273
BAK1	10	0.6312	0.8343	1.43713	0.971162	0.0254414	0.836739
RSL24D1	5	1.1312	1.8958	1.89575	1.0884	0.0177566	0.796475
PINX1	6	0.8522	0.7022	0.968105	0.436323	0.0356145	0.837809
CCNB2	6	0.9754	1.5288	1.61565	1.44204	0.0306901	0.837809
PEX14	6	0.7905	0.6167	0.881949	0.351434	0.0192802	0.796475
TSPAN17	9	0.9699	0.8254	2.11588	1.67336	0.0224657	0.815338
AIMP1	7	1.0055	1.866	1.86909	1.86601	0.041069	0.840619
IL26	8	0.5877	1.0138	1.0884	1.03865	0.00127897	0.609925
PHF14	9	0.6497	0.0426	1.06039	0.117664	0.00859972	0.791598
PI15	9	0.976	0.9541	1.5909	1.49439	0.00350339	0.74624
NKX2-1	6	0.8797	0.5234	0.699834	0.347002	0.0210635	0.796475
RSPRY1	7	0.7979	0.7258	1.2404	0.725829	0.0176741	0.796475
SBNO2	9	0.7923	0.5478	1.57383	1.00267	0.00939235	0.791598
HOXB3	6	1.4119	1.3212	1.40206	1.2404	0.00543791	0.791493
ACOX3	8	0.7982	0.9436	1.18066	1.17586	0.0276965	0.837809
SSH1	7	0.7933	1.0359	1.05445	1.03593	0.00614424	0.791493
DNAJC5	9	0.718	0.4869	2.31079	1.78657	0.0306139	0.837809
XDH	7	1.3166	1.6734	2.25832	1.67336	0.0149432	0.796475
PLEKHA3	8	0.6117	0.7149	0.866007	0.802095	0.0363874	0.837809
ANXA8L2	7	1.0942	1.5261	1.80461	1.52609	0.0209779	0.796475
CDCA3	7	1.7499	1.5738	1.9249	1.57383	0.000973392	0.508472
SLC11A2	8	1.146	1.3473	1.57383	1.38386	0.00899373	0.791598
TRAF1	7	0.8316	1.0884	1.7729	1.0884	0.0334239	0.837809
DSE	8	0.7695	0.2556	1.34366	0.302524	0.0194495	0.796475
PHACTR3	7	0.8184	0.6734	0.780277	0.673362	0.042195	0.840619
PEX16	8	1.1526	1.7619	2.06929	1.97592	0.00236138	0.715273
ARL6IP1	6	1.11	1.0602	1.15744	0.962869	0.046106	0.840619
APLNR	6	1.123	1.0574	1.11943	0.99529	0.00294263	0.735645
RNF215	7	0.9449	0.8621	1.78884	0.862124	0.0178256	0.796475
CTPS2	8	0.9578	1.2039	1.31079	1.25067	0.00308962	0.740329
FAM189B	6	0.7049	0.2601	0.624452	-0.104246	0.0151872	0.796475
SYT3	8	0.9559	0.9996	1.98456	1.64783	0.0109878	0.791598
SLC17A6	7	0.7764	0.9364	1.45097	0.936396	0.0296753	0.837809
SHPK	6	0.6705	1.4911	1.57939	1.40291	0.0336009	0.837809
SNX22	8	0.825	1.3823	1.78884	1.62897	0.0350192	0.837809
CRTC3	6	0.8696	1.5118	1.71289	1.31079	0.0388185	0.840619
TEX261	8	1.0954	1.352	1.67336	1.57383	0.00341761	0.74624
GPR160	9	0.8683	1.4218	1.71643	1.67336	0.0173445	0.796475
ZNF320	7	0.7736	0.7867	0.911522	0.786744	0.0106015	0.791598
SELT	7	0.6028	1.5034	1.50344	1.50344	0.045545	0.840619
ABCA7	7	0.6787	0.1759	1.67336	0.175862	0.0279679	0.837809
PHF21A	6	1.5449	1.0067	1.0884	0.924901	0.00185614	0.701412
METTL21B	6	0.8178	0.8809	1.0884	0.673362	0.00473971	0.791493
SMAD7	8	1.5274	1.6634	2.41033	1.70311	0.00210157	0.714018
FOXA1	9	0.7601	1.0884	1.61891	1.24886	0.0113798	0.791598
AKT1	6	0.6122	0.5681	0.725829	0.410328	0.0456394	0.840619
HEXDC	9	0.6245	0.8254	1.67336	0.940842	0.00724852	0.791598
MTX2	8	0.9615	1.4479	1.72583	1.4483	0.0186877	0.796475
REXO1	7	0.9842	1.2314	1.45097	1.23136	0.0109675	0.791598
MATN1	7	0.7793	0.8958	1.46691	0.895754	0.0172717	0.796475
MSI1	6	1.481	1.0688	1.46427	0.673362	0.00278991	0.725715
IQCK	9	0.6849	0.8743	1.29003	1.0884	0.00809897	0.791598
PEX6	5	1.6952	2.3211	2.32106	0.703109	0.00717068	0.791598
RNF146	9	0.6012	0.9601	1.31079	1.21178	0.0127658	0.791598
AGO3	8	0.9186	0.6098	1.67336	0.696917	0.00896017	0.791598
PI4KB	4	1.3122	1.8971	1.38386	-2.23353	0.0475576	0.840619
GRAMD4	4	0.7897	0.9161	0.895754	0.0242691	0.0356424	0.837809
CFH	8	0.6652	0.6137	0.895754	0.866007	0.0141008	0.791598
MST1R	6	1.0632	0.9575	1.54783	0.367115	0.0410534	0.840619
PMAIP1	8	1.076	0.8689	1.17586	1.05669	0.000173891	0.298536
OFD1	7	0.5872	0.1006	1.55971	0.100574	0.0112402	0.791598
IL1RL2	8	1.0311	1.9696	2.9717	2.33633	0.0140666	0.791598
MARK2	6	0.8286	0.6062	0.785837	0.426568	0.037543	0.837809
LCE2C	4	1.6009	1.0418	0.99529	0.825365	0.00441359	0.791493
NPPA	8	1.0789	1.2926	1.67336	1.50344	0.0328346	0.837809
FAM35A	4	1.1937	1.9675	1.44454	-2.49656	0.0432976	0.840619
ADRB2	8	1.0326	0.7199	1.96287	0.936396	0.0261689	0.837809
LGR4	8	0.7249	0.8809	1.83842	1.18794	0.00393997	0.791493
CELA1	7	0.762	0.281	0.310792	0.281045	0.0153375	0.796475
SMAD3	10	0.6251	0.6289	1.35143	1.2259	0.0323557	0.837809
N4BP2	9	0.7168	0.7258	1.0884	0.895754	0.0182207	0.796475
CSRNP2	7	1.2467	1.1709	1.27603	1.17086	0.00111882	0.564941
HSP90B1	4	1.3155	1.134	0.881949	0.13022	0.0247398	0.831181
INTS2	4	1.9358	1.8941	1.74551	0.618914	0.00735842	0.791598
OSBPL9	6	1.9875	2.6652	2.93449	2.39583	0.00961401	0.791598
HIST2H2BE	4	1.4226	1.6456	1.46592	-0.496563	0.042393	0.840619
PCDHGB1	8	0.7966	0.6859	1.027	0.94638	0.0371914	0.837809
RDH11	7	1.2469	1.6734	1.82537	1.67336	0.00463332	0.791493
PRKD1	7	1.065	1.2877	1.42468	1.28771	0.00854373	0.791598
UBD	10	0.6211	1.1287	1.80829	1.6893	0.0178563	0.796475
TYSND1	5	0.6391	0.3514	0.351434	-0.0815256	0.0199748	0.796475
IFITM2	6	0.6132	0.6892	1.0884	0.290033	0.0447284	0.840619
BBOX1	7	1.0584	0.8958	0.988864	0.895754	0.0104935	0.791598
ARID5B	10	0.6418	0.6633	1.33504	1.00594	0.00617778	0.791493
TSPAN4	7	0.7385	0.9889	0.99529	0.988864	0.00291068	0.735645
RALGAPA1	7	0.8764	1.9509	2.41033	1.9509	0.0368792	0.837809
TTC33	6	0.6239	0.6327	0.633834	0.631542	0.0270236	0.837809
ATP10B	7	0.9426	1.7051	2.29003	1.70507	0.00853856	0.791598
STARD6	8	0.9729	0.8512	2.0884	0.955133	0.00487958	0.791493
SPDYE6	9	0.7303	0.1838	1.89575	0.740476	0.0154896	0.796475
TTC7A	6	0.9106	1.0973	1.28834	0.906196	0.0138443	0.791598
TSPAN19	8	0.8302	0.6492	1.48547	0.847391	0.0303446	0.837809
AMBRA1	9	1.0066	1.4294	1.9509	1.86976	0.0310912	0.837809
RGS14	7	0.8433	1.4576	1.98652	1.45763	0.0456951	0.840619
GLYATL3	9	0.65	0.8109	1.5258	1.0884	0.047832	0.840619
CSMD2	6	1.2045	1.7407	2.0144	1.46691	0.0297154	0.837809
SPATA31C1	8	0.626	-0.2702	2.19692	-0.133993	0.0456315	0.840619
PSORS1C1	7	0.836	0.6734	1.2404	0.673362	0.0157014	0.796475
TMEM45A	8	0.8802	0.5675	1.57873	1.0884	0.0231809	0.820558
AMN	7	1.5163	1.0884	1.30252	1.0884	0.0142752	0.791598
KRT23	8	0.7592	1.0752	1.25832	1.13022	0.0468961	0.840619
HMGB3	7	1.1053	0.7583	1.25832	0.758251	0.00481028	0.791493
FAM212B	7	0.9452	0.6409	1.91847	0.64094	0.0186571	0.796475
